# Supplementary material
Source: Research Square preprint supplement (doi:10.21203/rs.3.rs-10200736/v1)
Supplement: Supplementary file 1 [file 5d39e26e08aa9ee475e78672.docx]

**Epidemiology and serotypic distribution of Group B Streptococcus Colonization in Shenyang: Associations with Adverse Pregnancy Outcomes and Risk Factors**

**Author Names:**

Xiaona Wangb, Meiru Wangb, Jialin Wangb, Chenglong Tongb, Shijiao Yuana, Xueyi Shanga,Xin Huanga,Yudong Wua, Kebin Xua,d,e,f [[1]](#footnote-0)*,Yanshuo Zhanga [[2]](#footnote-1)*, Xin Lic,d,e,f [[3]](#footnote-2)*

**Affiliations:**

aSchool of Public Health, Shenyang Medical College, Shenyang 110034, People’s Republic of China.

bDepartment of Laboratory Medicine, Shenyang Women’s and Children’s Hospital,Shenyang 110011, China

cSchool of Stomatology, Shenyang Medical College, Shenyang 110034, People’s Republic of China.

dLiaoning Province Key Laboratory for Phenomics of Human Ethnic Specificity and Critical Illness (LPKL-PHESCI), Shenyang 110034, People’s Republic of China.

eShenyang Key Laboratory for Phenomics, Shenyang 110034, People’s Republic of China.

fShenyang Key Laboratory of Prevention and Treatment of Systemic Important Diseases Associated with Oral Diseases, Shenyang 110034, People’s Republic of China.

**Corresponding Author：**

Kebin Xu:xukebin@symc.edu.cn

Yanshuo Zhang:zys20010322@163.com

Xin Li:httplixin@symc.edu.cn

**Figure**

(a)
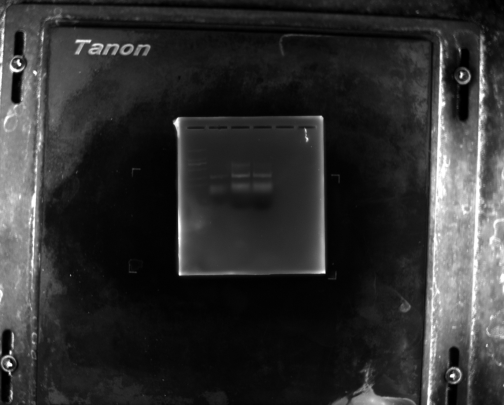
(b)
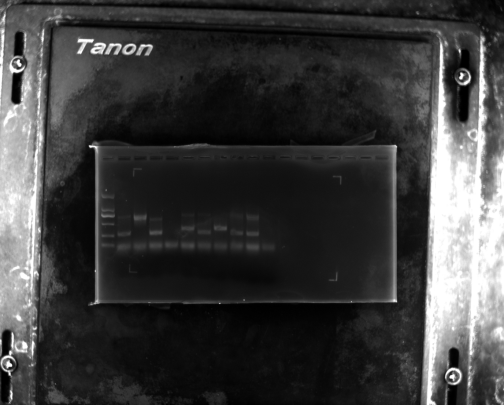


(c)
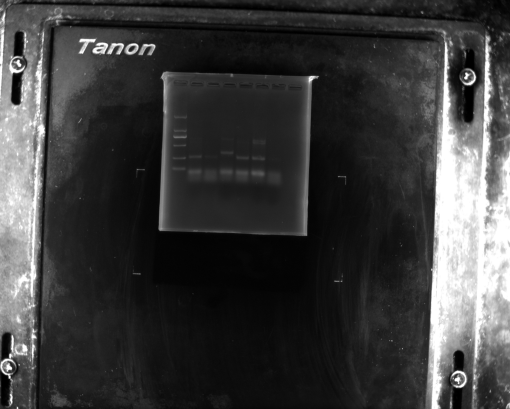
(d)
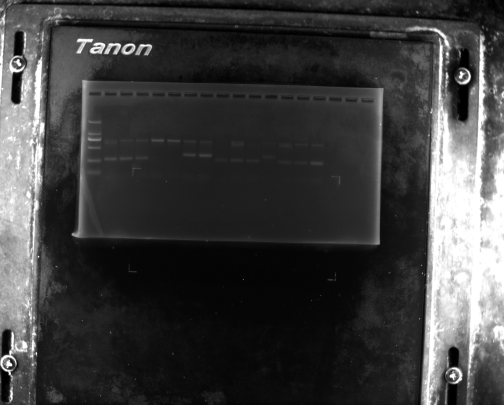


(e)
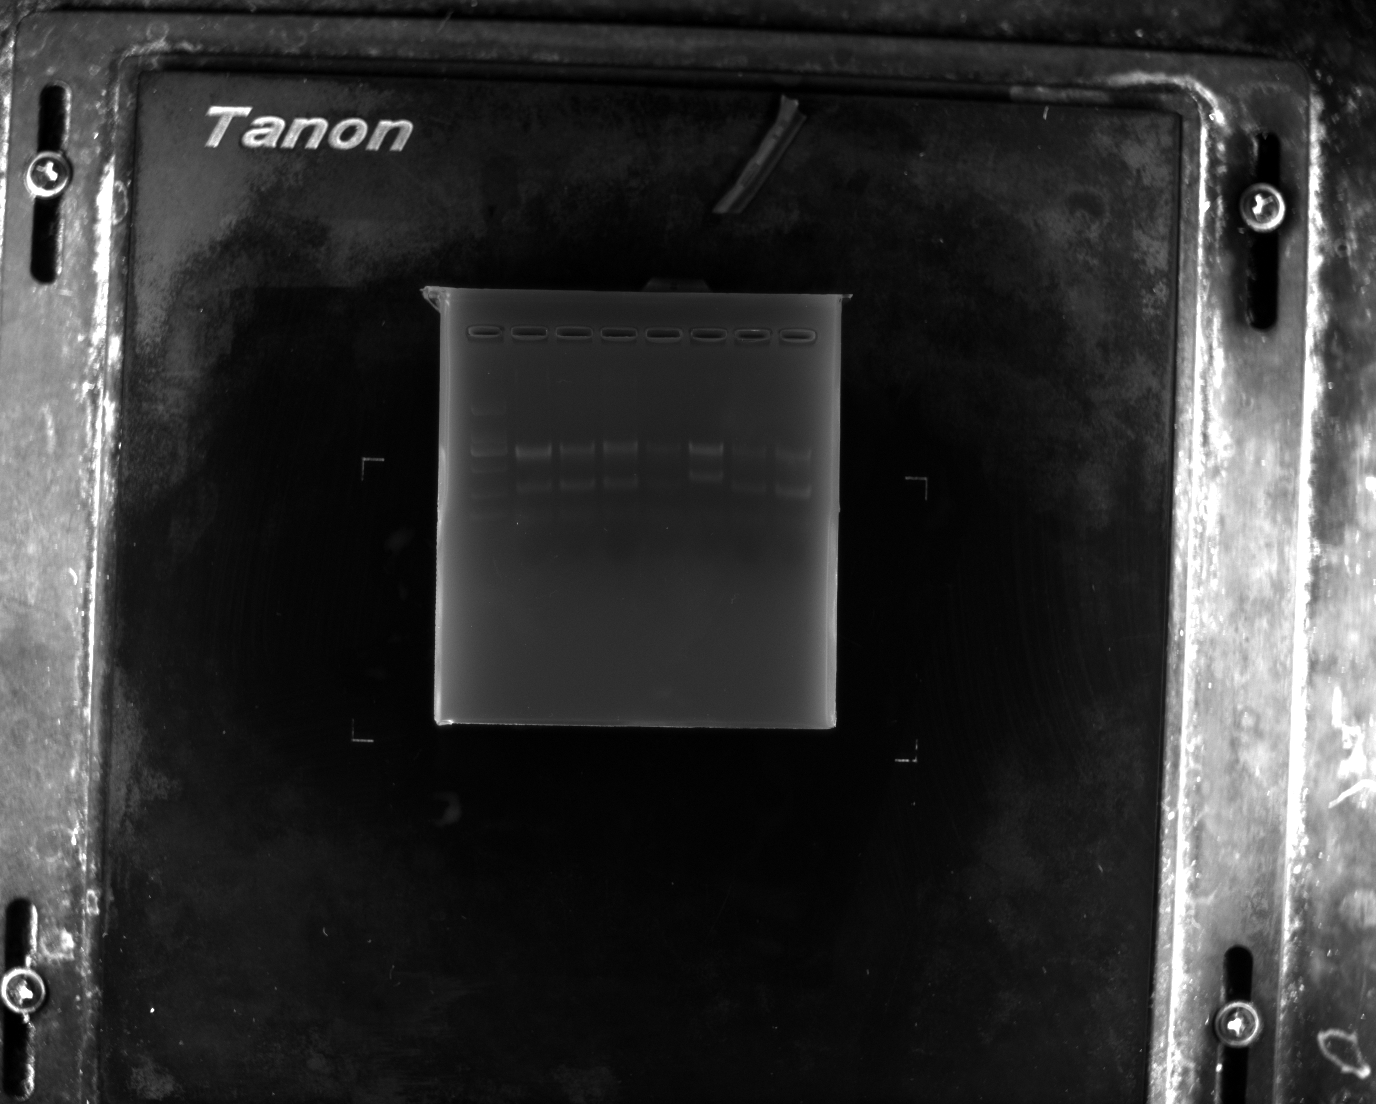
(f)
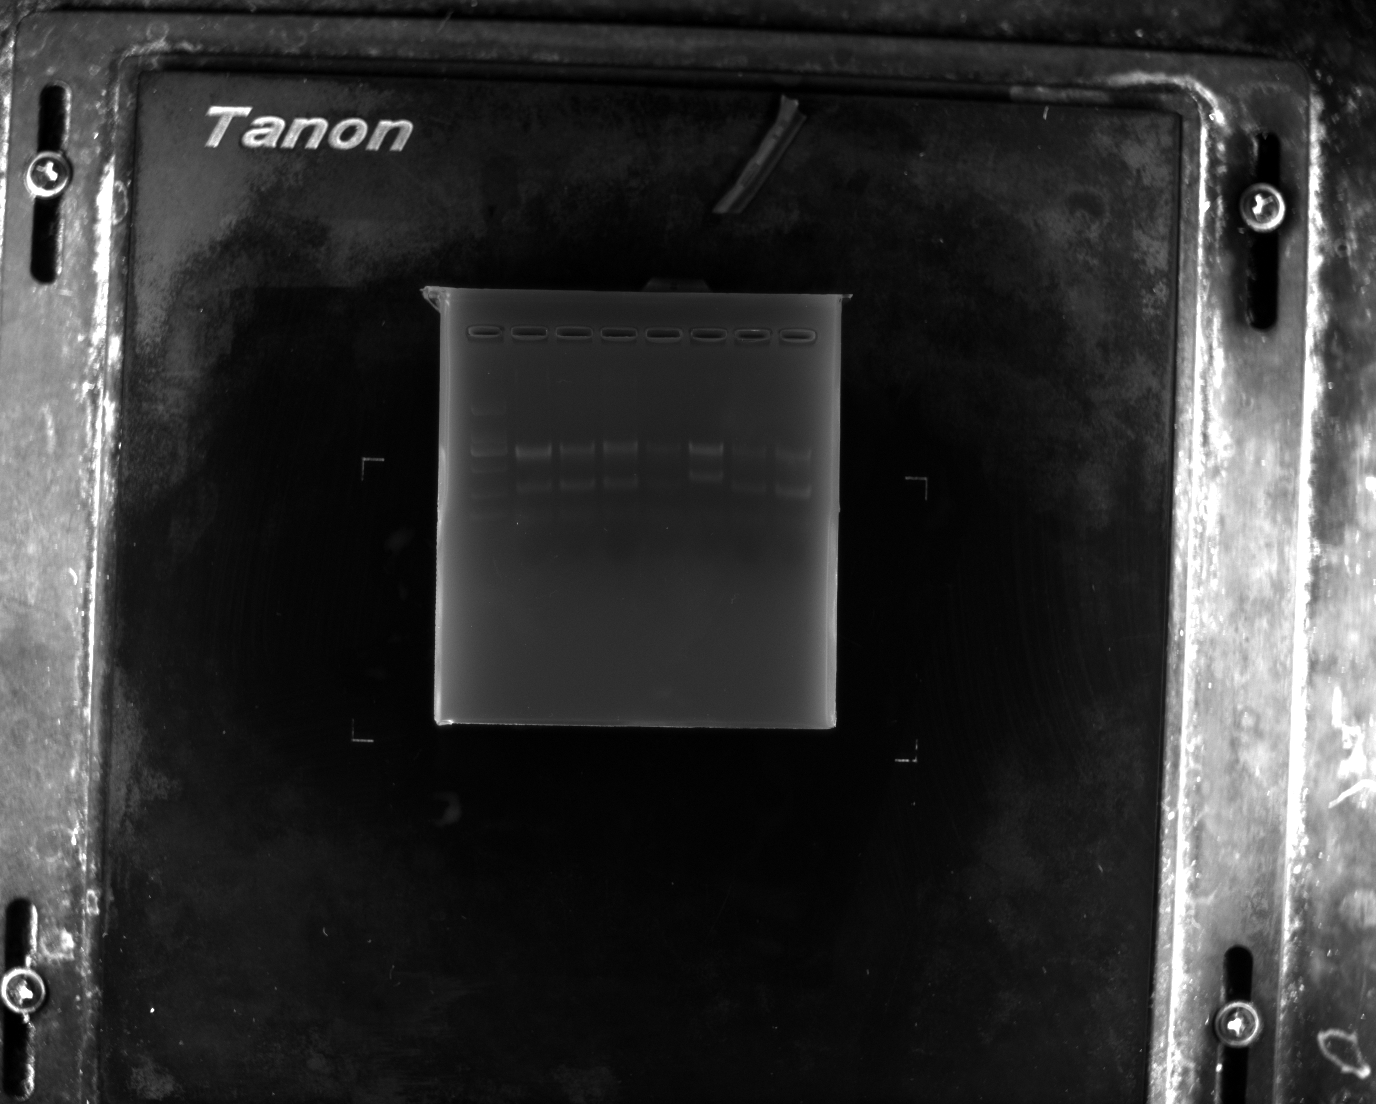


(g)
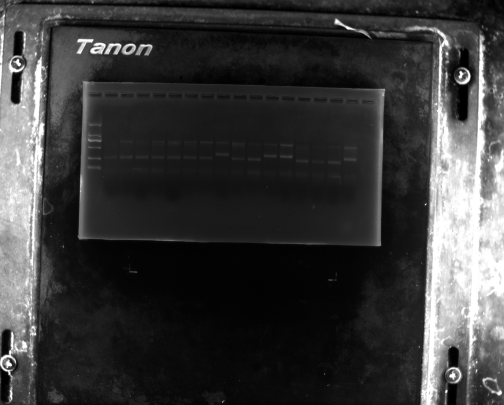
(h)
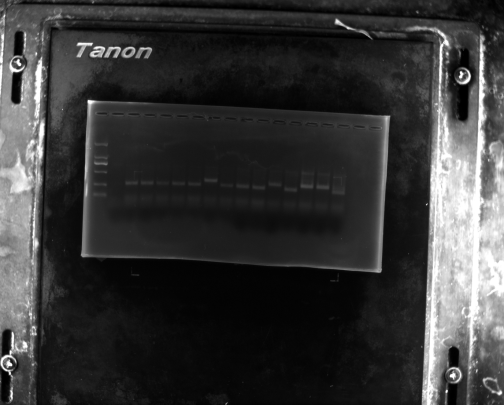


(i)
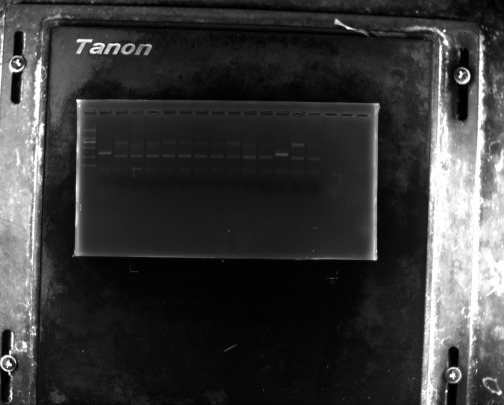


**Figure 4** ****Partial serotype band pattern****

**(a)(b)(c)(d)(e)(f)(g)(h)(i) Partial serotype band chart**

1. [↑](#footnote-ref-0)
2. [↑](#footnote-ref-1)
3. [↑](#footnote-ref-2)
